# Supplementary material for: Routine allomaternal nursing in a free-ranging Old World monkey
Source: PubMed Central journal article supplement — Sci Adv. 2019 Feb 20;5(2):eaav0499. doi: 10.1126/sciadv.aav0499 (PMC6382398; doi:10.1126/sciadv.aav0499), 2019-02-20
Supplement: aav0499_SM.pdf [file aav0499_SM.pdf]

## Supplementary Materials for

### **Routine allomaternal nursing in a free-ranging Old World monkey**

Zuofu Xiang\*, Penglai Fan, Haochun Chen, Ruoshuang Liu, Bo Zhang, Wanji Yang, Hui Yao,  
Cyril C. Grueter, Paul A. Garber, Ming Li\*

\*Corresponding author. Email: xiangzf@csuft.edu.cn (Z.X.); lim@ioz.ac.cn (M.L.)

Published 20 February 2019, *Sci. Adv.* **5**, eaav0499 (2019)  
DOI: 10.1126/sciadv.aav0499

#### **This PDF file includes:**

Table S1. The infant's mother, (potential) allonurser, proportion of allomaternal nursing (based on time spent nursing), and kin relationship between the allonurser and the infant's mother in the social units of a free-ranging group of golden snub-nosed monkeys (*R. roxellana*).

Table S2. AICc-ranked candidate model set showing relative importance of the following parameters on whether a female acted as allonurser.

Table S3. Social and ecological traits of primate species for which regular allomaternal nursing has been reported.

Table S4. Adult females' reproductive history in focal group that is composed of four to six OMUs.

References (45–49)

## Supplementary Online Materials

**Table S1. The infant's mother, (potential) allonurser, proportion of allomaternal nursing (based on time spent nursing), and kin relationship between the allonurser and the infant's mother in the social units of a free-ranging group of golden snub-nosed monkeys (*R. roxellana*).** We calculated the proportion of allonursing for all infants at two-week intervals using the formula,  $P_{ij} = 100 * n_{ij} / N_i$ , where  $P_{ij}$  = proportion (%) of infant A's allonursing in  $i$  period from allomother  $j$ ,  $n_{ij}$  = duration of infant A's allonursing in  $i$  period from allomother  $j$ ,  $N_i$  = total duration suckling of infant A's from both mother and allomother in  $i$  period. The mean proportion of allonursing from each two-week interval for each donor was used as the total allonursing score from that female. The total proportion of allonursing for a particular infant was summed from all donors.

| Social Unit | Year | Mother of infant | (Potential) Allonurser | Allomaternal nursing % | Total allomaternal nursing % | Kin relationship*** |     |
|-------------|------|------------------|------------------------|------------------------|------------------------------|---------------------|-----|
| BT          | 2012 | HH2              | TT1                    | 7.7                    | 10.7                         | M-D                 |     |
|             |      |                  | YY2                    | 1.4                    |                              | U                   |     |
|             |      |                  | DWB                    | 1.6                    |                              | U                   |     |
|             | 2013 | DWB              | HH2                    | 2.5                    | 5.4                          | U                   |     |
|             |      |                  | DWB                    | 2.9                    |                              | S-S                 |     |
|             |      |                  | HH2                    | 2.3                    | 5.1                          | U                   |     |
|             |      |                  | YY2                    | 2.8                    |                              | S-S                 |     |
|             |      |                  | YY2                    | 2.3                    |                              | U                   |     |
| HH4         | 2014 | HH2              | YY2                    | 2.3                    | 4.8                          | U                   |     |
|             |      |                  | DWB                    | 2.5                    |                              | U                   |     |
|             |      |                  | DWB                    | HH2                    | 3.6                          | 3.6                 | U   |
|             |      |                  |                        | TJ                     | 0.0                          |                     | U   |
|             | 2015 | DWB              | YY2                    | 0.0                    | 2.8                          | S-S                 |     |
|             |      |                  | TJ                     | 0.0                    |                              | U                   |     |
|             |      |                  | HH2                    | 4.6                    | 2.8                          | M-D                 |     |
|             |      |                  | DWB                    | 0.0                    |                              | U                   |     |
|             |      |                  | TJ*                    | YY2                    | 0.0                          | 4.6                 | U   |
|             |      |                  |                        | DWB                    | 0.0                          |                     | U   |
| DD          | 2015 | DWB              | HH2                    | 4.6                    | 5.4                          | M-D                 |     |
|             |      |                  | DWB                    | 0.0                    |                              | S-S                 |     |
|             |      |                  | YY2                    | 0.0                    | 5.4                          | U                   |     |
|             |      |                  | TJ                     | 5.4                    |                              | U                   |     |
|             | 2016 | HHE              | -                      | 0.0                    | 0.0                          | -                   |     |
|             |      |                  | DWB                    | 7.6                    |                              | M-D                 |     |
|             |      |                  | AL*                    | HH2                    | 2.1                          | 9.7                 | U   |
|             |      |                  |                        | YY2                    | 0.0                          |                     | U   |
|             |      |                  |                        | TJ                     | 0.0                          |                     | S-S |
|             |      |                  |                        | JJ1                    | 8.8                          |                     | M-D |
| 2012        | GG*  | LN               | 4.5                    | 13.3                   | U                            |                     |     |
|             |      | YY1              | 0.0                    |                        | U                            |                     |     |
|             |      | HH1              | 0.0                    |                        | U                            |                     |     |
|             |      | XL               | 0.0                    |                        | U                            |                     |     |

|  |      |      |      |      |      |     |
|--|------|------|------|------|------|-----|
|  |      |      | HH1  | 15.9 |      | M-D |
|  |      |      | YY1  | 3.1  |      | U   |
|  |      | XL   | LN   | 0.0  | 19.0 | U   |
|  |      |      | JJ1  | 0.0  |      | U   |
|  |      |      | GG   | 0.0  |      | U   |
|  |      |      | XL   | 3.8  |      | U   |
|  |      | YY1  | GG   | 0.0  | 3.8  | U   |
|  |      |      | LN   | 0.0  |      | U   |
|  | 2013 |      | GG   | 4.1  |      | U   |
|  |      | LN   | XL   | 0.0  | 4.1  | U   |
|  |      |      | YY1  | 0.0  |      | U   |
|  |      |      | LN   | 3.0  |      | U   |
|  |      | GG   | XL   | 0.0  | 3.0  | U   |
|  |      |      | YY1  | 0.0  |      | U   |
|  | 2014 |      | YY1  | 2.9  |      | U   |
|  |      | XL   | LN   | 0.0  | 2.9  | U   |
|  |      |      | GG   | 0.0  |      | U   |
|  |      |      | GG   | 3.2  |      | U   |
|  |      | LN   | YY1  | 0.0  | 4.8  | U   |
|  |      |      | SS   | 1.6  |      | U   |
|  |      |      | GG   | 1.9  |      | U   |
|  | 2015 | YY1  | LN   | 0.0  | 1.9  | U   |
|  |      |      | SS   | 0.0  |      | U   |
|  |      |      | GG   | 2.8  |      | S-S |
|  |      | SS*  | YY1  | 0.0  | 4.9  | U   |
|  |      |      | LN   | 2.1  |      | U   |
|  |      |      | SS   | 3.1  |      | S-S |
|  | 2016 | GG   | YY1  | 2.3  | 9.0  | U   |
|  |      |      | LN   | 3.6  |      | U   |
|  |      |      | XH** | 78.8 |      | M-D |
|  |      | HH3  | XB   | 5.5  | 84.3 | U   |
|  | 2012 |      | XH   | 2.4  |      | S-S |
|  |      | XB*  | HH3  | 0.0  | 2.4  | U   |
|  |      |      | XH   | 3.3  |      | M-D |
|  |      |      | XB   | 6.8  | 10.1 | U   |
|  |      |      | HH3  | 4.6  |      | M-D |
|  | 2013 | XB   | XH   | 0.0  | 4.6  | S-S |
|  |      |      | HH3  | 2.3  |      | U   |
|  |      |      | XB   | 0.0  | 2.3  | U   |
|  |      |      | -    | 0.0  | 0.0  | -   |
|  |      | JJ2* |      |      |      |     |
|  |      |      | XY   | 2.7  |      | U   |
|  |      | XE*  | XB   | 1.8  | 4.5  | U   |
|  |      |      | XH   | 0.0  |      | U   |
|  |      |      | XY*  | 3.1  | 5.3  | U   |
|  | 2014 |      | XE   |      |      |     |

|               |      |     |     |     |      |     |
|---------------|------|-----|-----|-----|------|-----|
|               |      |     | XH  | 2.2 |      | U   |
|               |      |     | XB  | 0.0 |      | U   |
|               |      |     | XH  | -   | 0.0  | -   |
|               | 2015 |     | ME  | 2.1 | 4.4  | U   |
|               |      | XB  | XE  | 2.3 |      | U   |
|               |      |     | XB  | 2.5 | 2.5  | U   |
|               |      | ME* | XE  | 0.0 |      | S-S |
| NN            | 2016 |     | XY  | 2.5 | 2.7  | U   |
|               |      |     | JJ2 | 2.9 | 2.9  | U   |
|               |      |     | TT2 | 4.1 |      | S-S |
|               | 2012 |     | HHE | 2.1 | 6.2  | U   |
|               |      | BB  | NN1 | 0.0 |      | U   |
|               |      |     | LL  | 0.0 |      | U   |
|               |      |     | BB  | 8.5 |      | M-D |
|               |      |     | HHE | 3.2 | 14.5 | U   |
|               |      | YB* | NN1 | 2.7 |      | U   |
|               |      |     | LL  | 0.0 |      | U   |
|               |      |     | TT2 | 0.0 |      | U   |
|               |      |     | NN1 | 0.0 |      | U   |
| XX            |      |     | HHE | 0.0 | 0.0  | U   |
|               |      | LL  | TT2 | 0.0 |      | U   |
|               |      |     | YB  | 0.0 |      | U   |
|               | 2013 |     | BB  | 0.0 |      | U   |
|               |      |     | HHE | 2.4 |      | S-S |
|               |      |     | LL  | 0.0 |      | U   |
|               |      | NN1 | TT2 | 0.0 | 2.4  | U   |
|               |      |     | YB  | 0.0 |      | U   |
|               |      |     | BB  | 0.0 |      | U   |
|               |      |     | NN1 | 3.7 |      | S-S |
|               |      |     | BB  | 3.0 |      | U   |
|               |      | HHE | LL  | 0.0 | 6.3  | U   |
|               |      |     | TT2 | 0.0 |      | U   |
|               |      |     | YB  | 0.0 |      | U   |
|               |      |     | BB  | 2.7 |      | S-S |
|               |      |     | NN1 | 0.0 | 2.7  | U   |
|               |      | TT2 | LL  | 0.0 |      | U   |
|               |      |     | HHE | 0.0 |      | U   |
| WY            | 2014 |     | HHE | 3.9 |      | U   |
|               |      |     | TT2 | 2.1 | 13.9 | S-S |
|               |      | BB  | YB  | 7.8 |      | M-D |
|               |      |     | NN1 | 0.0 |      | U   |
| GE<br>(Gu-Er) | 2015 |     | TT2 | 0.0 | 0.0  | U   |
|               |      | NN1 | BB  | 0.0 |      | U   |

|    |     |     |     |     |     |
|----|-----|-----|-----|-----|-----|
|    | TT2 | BB  | 2.6 |     | U   |
|    |     | NN1 | 0.0 | 2.6 | S-S |
|    | LL  | -   | 0.0 | 0.0 | -   |
|    | YB  | BB  | 5.6 |     | M-D |
|    |     | EB  | 0.0 | 5.6 | S-S |
| YH | XF* | -   | 0.0 | 0.0 | -   |
|    | EB* | YB  | 3.5 | 3.5 | S-S |

\*primiparous mothers.

\*\*give a stillborn

\*\*\*The kinship between mother and allonuser. M-D:Mother-daughter; S-S:Sister- sister; U: Unrelated.

**Table S2. AICc-ranked candidate model set showing relative importance of the following parameters on whether a female acted as allonurser.**

| Model                                                            | Parameters<br>( <i>k</i> ) | Log<br>likelihood | AICc  | $\Delta_i$ | $\omega_i$ |
|------------------------------------------------------------------|----------------------------|-------------------|-------|------------|------------|
| Relatedness, reciprocity, age of offspring, reproductive history | 6                          | -26.8             | 66.43 | 0          | 0.8        |
| Relatedness, reciprocity, reproductive history                   | 5                          | -29.97            | 70.53 | 4.1        | 0.1        |
| Relatedness, reciprocity, age of offspring                       | 5                          | -30.38            | 71.35 | 4.92       | 0.07       |
| Relatedness, reciprocity,                                        | 4                          | -32.21            | 72.8  | 6.38       | 0.03       |

Submodels were derived from a global model using a cutoff of 2AICc greater than the best-fitting model.

**Table S3. Social and ecological traits of primate species for which regular allomaternal nursing has been reported.**

| <b>Taxa</b>      | <b>Species</b>                 | <b>% nursing by allonurser</b> | <b>Breeding Season (in mo)</b> | <b>Encephalization quotient</b> | <b>Philopatry</b> | <b>Habitat</b>      | <b>Median litter size</b> |
|------------------|--------------------------------|--------------------------------|--------------------------------|---------------------------------|-------------------|---------------------|---------------------------|
| Prosimian        | <i>Microcebus murinus</i>      | 3.3-16.7 (4)                   | 1 (4)                          | 1.4 (47)                        | Female (4)        | Seasonal (4)        | 2.05 (36)                 |
|                  | <i>Varecia rubra</i>           | Common (5)                     | 1 (5)                          | 1.4 (47)                        | Female (5)        | Seasonal (5)        | 2.11 (36)                 |
| New World monkey | <i>Cebus olivaceus</i>         | 11.4 (6)                       | 4 (45)                         | 2.4-2.8 (47)                    | Female (6)        | 4m dry & 6m wet (6) | 1.01 (36)                 |
|                  | <i>Cebus nigrinus</i>          | 13 (8)                         | 5 (8)                          | 2.4-2.8 (47)                    | Female (8)        | Seasonal (48)       | 1.05 (36)                 |
|                  | <i>Cebus capucinus</i>         | 12.4 (9)                       | 7 (46)                         | 2.4-2.8 (47)                    | Female (9)        | 5m dry & 7m wet (9) | 1 (36)                    |
|                  | <i>Saimiri boliviensis</i>     | 5-10 (7)                       | 2 (7)                          | 2.3 (47)                        | Female (7)        | Seasonal (7)        | 1.02 (36)                 |
| Old World monkey | <i>Rhinopithecus roxellana</i> | 4.8 (this study)               | 3 (26)                         | -                               | Female (24)       | Seasonal (21)       | 1 (36)                    |
| Ape              | <i>Homo sapiens</i>            | Common (10)                    | NA                             | 7.4-7.8 (47)                    | Female (49)       | Seasonal (10)       | 1 (36)                    |

**Table S4. Adult females' reproductive history in focal group that is composed of four to six OMUs.**

| Female      | Abbreviation | Reproductive Status a |      |      |      |      |
|-------------|--------------|-----------------------|------|------|------|------|
|             |              | 2012                  | 2013 | 2014 | 2015 | 2016 |
| Ni-Ni       | NN1          |                       | M    |      | M    |      |
| Long-Long   | LL           |                       | M    |      |      |      |
| Hong-Hai-Er | HHE          |                       | M    |      |      |      |
| Tian-Tian   | TT2          |                       | M    |      | M    |      |
| Bao-Bao     | BB           | M                     |      | M    |      |      |
| Yi-Bao      | YB           |                       | P    |      | M    |      |
| Er-Bao      | EB           |                       |      |      | P    |      |
| Jun-Jun     | JJ1          |                       |      |      |      |      |
| Si-Si       | SS           |                       |      |      | P    |      |
| Guai-Guai   | GG           | P                     |      | M    |      | M    |
| Xiao-Li     | XL           | M                     |      | M    |      |      |
| Hu-Hu       | HH1          |                       |      |      |      |      |
| Lao-Ni      | LN           |                       | M    |      | M    |      |
| Ying-Ying   | YY1          |                       | M    |      | M    |      |
| Da-Da       | DD1          |                       |      |      |      |      |
| Tuan-tuan   | TT1          |                       |      |      |      |      |
| Tuan-Jie    | TJ           |                       |      |      | P    |      |
| Yin-Yin     | YY2          |                       | M    |      | M    |      |
| Duan-Wei-Ba | DWB          |                       | M    |      | M    |      |
| Ai-Li       | AL           |                       |      |      |      | P    |
| Hong-Hai-Er | HHE          |                       |      |      | M    |      |
| Tuan-Jie    | TJ           |                       |      |      | P    |      |
| Huan-Huan   | HH2          | M                     |      | M    | M    |      |
| Xiao-Bei    | XB           | P                     | M    |      | M    |      |
| Huan-Huan   | HH3          | M                     | M    |      |      |      |
| Xiao-Hu     | XH           | P                     | M    |      | M    |      |
| Xue-Er      | XE           |                       |      | P    |      |      |
| Xin-Feng    | XF           |                       |      |      | P    |      |
| Mi-Er       | ME           |                       |      |      | P    |      |
| Xiao-Yan    | XY           |                       |      | P    |      | M    |
| Jing-Jing   | JJ2          |                       |      | P    |      | M    |

a, P, a primiparous female during the year when she gives birth, and M for multiparous during each subsequent year when she gives birth;
